# Supplementary material for: Stability evaluation of reference genes for gene expression analysis by RT-qPCR in soybean under different conditions
Source: PubMed Central journal article supplement (PMC5728501; doi:10.1371/journal.pone.0189405), 2017-12-13
Supplement: pone.0189405.s001.pdf [file pone.0189405.s001.pdf]

S1 Table. Set of samples (organ/developmental stage/treatment) used for gene expression analysis.

| No | cultivar | organ | Developmental stage | Time point | Treatment                  |
|----|----------|-------|---------------------|------------|----------------------------|
| 1  | ZD32     | Leaf  | V1                  |            | Control-non-inoculated     |
| 2  | ZD32     | Leaf  | V1                  | 15 min     | SMV-inoculated leaf        |
| 3  | ZD32     | Leaf  | V1                  | 6 h        | SMV-inoculated leaf        |
| 4  | ZD29     | Leaf  | V1                  |            | Control-non-inoculated     |
| 5  | ZD29     | Leaf  | V1                  | 15 min     | SMV-inoculated leaf        |
| 6  | ZD29     | Leaf  | V1                  | 6 h        | SMV-inoculated leaf        |
| 7  | TL1      | Leaf  | VE                  |            |                            |
| 8  | TL1      | Leaf  | V1                  |            |                            |
| 9  | TL1      | Leaf  | V3                  |            |                            |
| 10 | TL2      | Leaf  | VE                  |            |                            |
| 11 | TL2      | Leaf  | V1                  |            |                            |
| 12 | TL2      | Leaf  | V3                  |            |                            |
| 13 | PH       | Leaf  | V2                  | 4 h        | 10% normal N concentration |
| 14 | PH       | Leaf  | V3                  | 6 DAI      | 10% normal N concentration |
| 15 | PH       | Leaf  | V2                  | 4 h        | 10 times N concentration   |
| 16 | PH       | Leaf  | V3                  | 6 DAI      | 10 times N concentration   |
| 17 | PH       | Root  | V2                  | 4 h        | 10% normal N concentration |
| 18 | PH       | Root  | V3                  | 6 DAI      | 10% normal N concentration |
| 19 | PH       | Root  | V2                  | 4 h        | 10 times N concentration   |
| 20 | PH       | Root  | V3                  | 6 DAI      | 10 times N concentration   |
