# Supplementary material for: Stability evaluation of reference genes for gene expression analysis by RT-qPCR in soybean under different conditions
Source: PubMed Central journal article supplement (PMC5728501; doi:10.1371/journal.pone.0189405), 2017-12-13
Supplement: pone.0189405.s002.pdf [file pone.0189405.s002.pdf]

S2 Table. Average value of CT from three biological replicates  $\pm$  standard deviation (SD) of 9 genes along all treatments.

| ZD32_SMV         | <i>60S</i>        | <i>Fbox</i>       | <i>ELF1A</i>      | <i>ELF1B</i>      | <i>ACT11</i>      |
|------------------|-------------------|-------------------|-------------------|-------------------|-------------------|
| Ct $\pm$ SD      |                   |                   |                   |                   |                   |
| Control          | 21.07 $\pm$ 0.316 | 20.50 $\pm$ 0.056 | 16.84 $\pm$ 0.160 | 21.00 $\pm$ 0.127 | 18.11 $\pm$ 0.264 |
| 15 min           | 22.34 $\pm$ 0.918 | 22.66 $\pm$ 0.101 | 18.55 $\pm$ 0.098 | 22.98 $\pm$ 0.137 | 20.90 $\pm$ 0.331 |
| 6 h              | 21.19 $\pm$ 0.218 | 21.57 $\pm$ 0.111 | 17.62 $\pm$ 0.207 | 21.70 $\pm$ 0.029 | 20.30 $\pm$ 0.147 |
| ZD29_SMV         |                   |                   |                   |                   |                   |
| Control          | 21.60 $\pm$ 0.223 | 20.98 $\pm$ 0.119 | 18.05 $\pm$ 0.139 | 21.97 $\pm$ 0.085 | 19.89 $\pm$ 0.031 |
| 15 min           | 21.57 $\pm$ 0.080 | 21.84 $\pm$ 0.192 | 17.86 $\pm$ 0.070 | 22.03 $\pm$ 0.110 | 20.16 $\pm$ 0.070 |
| 6 h              | 20.89 $\pm$ 0.238 | 21.07 $\pm$ 0.082 | 17.67 $\pm$ 0.198 | 21.52 $\pm$ 0.029 | 19.99 $\pm$ 0.044 |
| ZD32 vs ZD29_SMV |                   |                   |                   |                   |                   |
| ZD32-Control     | 21.47 $\pm$ 0.206 | 21.27 $\pm$ 0.220 | 16.95 $\pm$ 0.071 | 21.17 $\pm$ 0.278 | 18.86 $\pm$ 0.174 |
| ZD32-15 min      | 22.74 $\pm$ 0.086 | 22.83 $\pm$ 0.109 | 18.96 $\pm$ 0.103 | 22.98 $\pm$ 0.064 | 21.04 $\pm$ 0.284 |
| ZD29-Control     | 21.72 $\pm$ 0.155 | 22.05 $\pm$ 0.042 | 18.53 $\pm$ 0.101 | 22.55 $\pm$ 0.095 | 20.46 $\pm$ 0.209 |
| ZD29-15 min      | 21.60 $\pm$ 0.090 | 21.88 $\pm$ 0.094 | 18.37 $\pm$ 0.143 | 22.42 $\pm$ 0.137 | 19.78 $\pm$ 0.232 |
|                  |                   |                   |                   |                   |                   |
| ZD32_SMV         | <i>TUA5</i>       | <i>UBC4</i>       | <i>G6PD</i>       | <i>CYP2</i>       |                   |
| Ct $\pm$ SD      |                   |                   |                   |                   |                   |
| Control          | 18.87 $\pm$ 0.140 | 18.78 $\pm$ 0.399 | 21.11 $\pm$ 0.110 | 16.08 $\pm$ 0.129 |                   |
| 15 min           | 20.38 $\pm$ 0.281 | 22.80 $\pm$ 0.107 | 22.77 $\pm$ 0.136 | 18.79 $\pm$ 0.094 |                   |
| 6 h              | 19.56 $\pm$ 0.143 | 21.70 $\pm$ 0.147 | 21.92 $\pm$ 0.155 | 17.66 $\pm$ 0.051 |                   |
| ZD29_SMV         |                   |                   |                   |                   |                   |
| Control          | 20.30 $\pm$ 0.245 | 21.61 $\pm$ 0.032 | 22.39 $\pm$ 0.076 | 17.05 $\pm$ 0.143 |                   |
| 15 min           | 19.88 $\pm$ 0.252 | 21.98 $\pm$ 0.210 | 22.28 $\pm$ 0.047 | 17.64 $\pm$ 0.159 |                   |
| 6 h              | 19.35 $\pm$ 0.174 | 21.29 $\pm$ 0.113 | 21.43 $\pm$ 0.235 | 17.69 $\pm$ 0.007 |                   |
| ZD32 vs ZD29_SMV |                   |                   |                   |                   |                   |
| ZD32-Control     |                   | 20.05 $\pm$ 0.001 | 21.34 $\pm$ 0.181 | 16.53 $\pm$ 0.240 |                   |
| ZD32-15 min      |                   | 23.83 $\pm$ 0.083 | 23.82 $\pm$ 0.145 | 18.88 $\pm$ 0.219 |                   |
| ZD29-Control     |                   | 22.26 $\pm$ 0.152 | 23.51 $\pm$ 0.251 | 18.07 $\pm$ 0.062 |                   |
| ZD29-15 min      |                   | 22.97 $\pm$ 0.113 | 22.59 $\pm$ 0.026 | 17.86 $\pm$ 0.223 |                   |

| TL1        | <i>60S</i>    | <i>Fbox</i>   | <i>ELF1A</i>  | <i>ELF1B</i>  | <i>ACT11</i>  |
|------------|---------------|---------------|---------------|---------------|---------------|
|            | Ct ± SD       |               |               |               |               |
| VE         | 21.30 ± 0.248 | 20.35 ± 0.070 | 17.49 ± 0.100 | 21.02 ± 0.055 | 19.28 ± 0.199 |
| V1         | 20.55 ± 0.093 | 19.43 ± 0.445 | 16.83 ± 0.056 | 21.76 ± 0.126 | 18.90 ± 0.128 |
| V3         | 19.61 ± 0.180 | 19.31 ± 0.052 | 16.57 ± 0.241 | 20.06 ± 0.139 | 18.53 ± 0.166 |
| TL.2       |               |               |               |               |               |
| VE         | 19.42 ± 0.028 | 19.27 ± 0.118 | 16.91 ± 0.191 | 20.68 ± 0.147 | 18.82 ± 0.158 |
| V1         | 19.98 ± 0.073 | 20.13 ± 0.111 | 16.84 ± 0.150 | 21.68 ± 0.047 | 18.75 ± 0.133 |
| V3         | 18.95 ± 0.147 | 18.99 ± 0.081 | 16.15 ± 0.371 | 19.88 ± 0.173 | 18.27 ± 0.104 |
| TL1 vs TL2 |               |               |               |               |               |
| TL1 VE     | 21.03 ± 0.296 | 20.10 ± 0.269 | 17.17 ± 0.179 | 20.41 ± 0.219 | 18.86 ± 0.148 |
| TL1 V1     | 20.31 ± 0.027 | 19.81 ± 0.024 | 16.74 ± 0.092 | 21.50 ± 0.132 | 18.45 ± 0.135 |
| TL2 VE     | 19.37 ± 0.184 | 19.68 ± 0.129 | 17.21 ± 0.187 | 20.93 ± 0.022 | 18.31 ± 0.263 |
| TL2 V1     | 19.69 ± 0.002 | 19.68 ± 0.254 | 17.27 ± 0.110 | 21.58 ± 0.097 | 17.74 ± 0.233 |
| TL1        | <i>TUA5</i>   | <i>UBC4</i>   | <i>G6PD</i>   | <i>CYP2</i>   |               |
|            | Ct ± SD       |               |               |               |               |
| VE         | 20.41 ± 0.254 | 20.26 ± 0.261 | 21.95 ± 0.022 | 16.95 ± 0.178 |               |
| V1         | 19.89 ± 0.241 | 19.46 ± 0.154 | 22.50 ± 0.119 | 17.27 ± 0.174 |               |
| V3         | 18.61 ± 0.156 | 19.13 ± 0.079 | 20.37 ± 0.296 | 15.83 ± 0.108 |               |
| TL2        |               |               |               |               |               |
| VE         | 19.66 ± 0.270 | 18.53 ± 0.180 | 21.38 ± 0.068 | 17.09 ± 0.339 |               |
| V1         | 20.47 ± 0.058 | 18.71 ± 0.294 | 21.96 ± 0.077 | 17.17 ± 0.087 |               |
| V3         | 18.13 ± 0.007 | 18.79 ± 0.109 | 19.85 ± 0.233 | 15.24 ± 0.312 |               |
| TL1 vs TL2 |               |               |               |               |               |
| TL1 VE     |               | 21.87 ± 0.039 | 21.96 ± 0.062 | 16.87 ± 0.007 |               |
| TL1 V1     |               | 20.69 ± 0.142 | 22.33 ± 0.125 | 17.29 ± 0.229 |               |
| TL2 VE     |               | 19.95 ± 0.071 | 21.87 ± 0.210 | 17.33 ± 0.107 |               |
| TL2 V1     |               | 20.54 ± 0.168 | 21.95 ± 0.222 | 17.72 ± 0.021 |               |

| PH shoots_N stress          | <i>60S</i>    | <i>Fbox</i>   | <i>ELF1A</i>  | <i>ELF1B</i>  | <i>ACT11</i>   |
|-----------------------------|---------------|---------------|---------------|---------------|----------------|
| Shoot_high N 4 h            | 25.72 ± 0.152 | 23.37 ± 0.082 |               | 25.32 ± 0.268 | 22.52 ± 0.119  |
| Shoot_low N 4 h             | 26.52 ± 0.151 | 23.67 ± 0.042 |               | 25.38 ± 0.032 | 22.40 ± 0.131  |
| Shoot_high N 6 DAI          | 26.66 ± 0.222 | 24.01 ± 0.085 |               | 26.03 ± 0.036 | 23.26 ± 0.071  |
| Shoot_low N 6 DAI           | 21.93 ± 0.097 | 20.78 ± 0.175 |               | 23.20 ± 0.162 | 20.73 ± 0.0362 |
| PH roots_N stress           |               |               |               |               |                |
| Root_high N 4 h             | 29.22 ± 0.243 | 24.94 ± 0.125 |               | 26.19 ± 0.048 | 24.25 ± 0.069  |
| Root_low N 4 h              | 29.72 ± 31.73 | 25.34 ± 0.156 |               | 26.21 ± 0.054 | 23.62 ± 0.156  |
| Root_high N 6 DAI           | 31.73 ± 0.108 | 29.73 ± 0.079 |               | 30.15 ± 0.050 | 28.30 ± 0.283  |
| Root_low N 6 DAI            | 30.48 ± 0.358 | 26.90 ± 0.067 |               | 28.23 ± 0.210 | 25.66 ± 0.262  |
| PH shoots vs roots_N stress |               |               |               |               |                |
| Shoot_high N 4 h            | 27.85 ± 0.168 | 25.33 ± 0.123 | 22.01 ± 0.213 | 26.70 ± 0.034 | 24.71 ± 0.118  |
| Root_high N 4 h             | 28.77 ± 0.207 | 24.59 ± 0.071 | 22.98 ± 0.067 | 26.10 ± 0.111 | 24.32 ± 0.044  |
|                             |               |               |               |               |                |
| PH shoots                   | <i>TUA5</i>   | <i>UBC4</i>   | <i>G6PD</i>   | <i>CYP2</i>   |                |
|                             | Ct ± SD       |               |               |               |                |
| Shoot_high N 4 h            | 22.18 ± 0.091 | 23.67 ± 0.101 | 26.09 ± 0.056 | 18.10 ± 0.151 |                |
| Shoot_low N 4 h             | 21.26 ± 0.119 | 23.18 ± 0.068 | 26.73 ± 0.054 | 18.17 ± 0.148 |                |
| Shoot_high N 6 DAI          | 24.23 ± 0.170 | 23.82 ± 0.070 | 25.53 ± 0.026 | 19.04 ± 0.108 |                |
| Shoot_low N 6 DAI           | 21.40 ± 0.306 | 21.05 ± 0.150 | 20.69 ± 0.013 | 17.02 ± 0.110 |                |
| PH roots_N stress           |               |               |               |               |                |
| Root_high N 4 h             | 24.26 ± 0.351 | 26.26 ± 0.083 | 24.78 ± 0.146 | 20.14 ± 0.287 |                |
| Root_low N 4 h              | 24.50 ± 0.263 | 25.44 ± 0.380 | 26.29 ± 0.336 | 20.36 ± 0.217 |                |
| Root_high N 6 DAI           | 25.91 ± 0.463 | 30.08 ± 0.087 | 30.39 ± 0.163 | 22.61 ± 0.142 |                |
| Root_low N 6 DAI            | 24.56 ± 0.562 | 28.05 ± 0.264 | 26.51 ± 0.170 | 21.21 ± 0.068 |                |
| PH shoots vs roots_N stress |               |               |               |               |                |
| Shoot_high N 4 h            | 23.96 ± 0.061 | 25.80 ± 0.247 | 28.69 ± 0.057 | 19.95 ± 0.103 |                |
| Root_high N 4 h             | 24.22 ± 0.123 | 25.92 ± 0.306 | 25.30 ± 0.125 | 19.94 ± 0.184 |                |

| ZD32 VS TL1 vs PH  | <i>60S</i>  | <i>Fbox</i> | <i>ELF1A</i> | <i>ELF1B</i> | <i>ACT11</i> |
|--------------------|-------------|-------------|--------------|--------------|--------------|
| ZD32 Control       | 20.09±0.137 | 19.88±0.056 | 16.62±0.101  | 20.37±0.061  | 17.91±0.097  |
| TL1 VE             | 21.93±0.124 | 21.80±0.031 | 19.12±0.096  | 22.41±0.085  | 20.57±0.164  |
| PH shoot_high N 4h | 26.17±0.111 | 23.86±0.084 | 19.39±0.214  | 24.16±0.129  | 21.91±0.089  |

| ZD32 VS TL1 vs PH  | <i>TUA5</i> | <i>UBC4</i> | <i>G6PD</i> | <i>CYP2</i> |
|--------------------|-------------|-------------|-------------|-------------|
|                    | Ct±SD       |             |             |             |
| ZD32 Control       | 18.19±0.104 | 19.52±0.026 | 20.11±0.286 | 14.79±0.008 |
| TL1 VE             | 20.32±0.278 | 22.56±0.324 | 23.69±0.154 | 18.67±0.145 |
| PH shoot_high N 4h | 20.14±0.286 | 22.29±0.460 | 26.97±0.171 | 18.14±0.206 |
