# Supplementary material for: Stability evaluation of reference genes for gene expression analysis by RT-qPCR in soybean under different conditions
Source: PubMed Central journal article supplement (PMC5728501; doi:10.1371/journal.pone.0189405), 2017-12-13
Supplement: pone.0189405.s004.pdf [file pone.0189405.s004.pdf]

S4 Table. Ranking of candidate reference genes in order of their expression stability as calculated by geNorm.

|                   | 1            | 2            | 3            | 4            | 5            | 6           | 7            | 8            | 9           |
|-------------------|--------------|--------------|--------------|--------------|--------------|-------------|--------------|--------------|-------------|
| ZD32              | <i>ELF1A</i> | <i>G6PD</i>  | <i>TUA5</i>  | <i>ELF1B</i> | <i>Fbox</i>  | <i>60S</i>  | <i>CYP2</i>  | <i>ACT11</i> | <i>UBC4</i> |
| M value           | 0.039        | 0.039        | 0.071        | 0.147        | 0.188        | 0.251       | 0.336        | 0.431        | 0.592       |
| ZD29              | <i>60S</i>   | <i>G6PD</i>  | <i>ELF1B</i> | <i>TUA5</i>  | <i>ELF1A</i> | <i>UBC4</i> | <i>ACT11</i> | <i>Fbox</i>  | <i>CYP2</i> |
| M value           | 0.126        | 0.126        | 0.170        | 0.196        | 0.226        | 0.248       | 0.275        | 0.325        | 0.380       |
| ZD32 & ZD29       | <i>ELF1A</i> | <i>ELF1B</i> | <i>CYP2</i>  | <i>ACT11</i> | <i>G6PD</i>  | <i>Fbox</i> | <i>60S</i>   | <i>UBC4</i>  |             |
| M value           | 0.093        | 0.093        | 0.174        | 0.221        | 0.267        | 0.310       | 0.381        | 0.519        |             |
| TL1               | <i>Fbox</i>  | <i>UBC4</i>  | <i>ELF1A</i> | <i>ACT11</i> | <i>60S</i>   | <i>TUA5</i> | <i>CYP2</i>  | <i>ELF1B</i> | <i>G6PD</i> |
| M value           | 0.105        | 0.105        | 0.114        | 0.166        | 0.264        | 0.333       | 0.407        | 0.480        | 0.533       |
| TL2               | <i>60S</i>   | <i>Fbox</i>  | <i>ELF1B</i> | <i>G6PD</i>  | <i>TUA5</i>  | <i>CYP2</i> | <i>ELF1A</i> | <i>ACT11</i> | <i>UBC4</i> |
| M value           | 0.153        | 0.153        | 0.296        | 0.423        | 0.446        | 0.475       | 0.512        | 0.535        | 0.601       |
| TL1 & TL2         | <i>Fbox</i>  | <i>G6PD</i>  | <i>ELF1A</i> | <i>ACT11</i> | <i>60S</i>   | <i>UBC4</i> | <i>CYP2</i>  | <i>ELF1B</i> |             |
| M value           | 0.273        | 0.273        | 0.350        | 0.402        | 0.497        | 0.540       | 0.588        | 0.635        |             |
| PH-shoots         | <i>ELF1B</i> | <i>ACT11</i> | <i>UBC4</i>  | <i>Fbox</i>  | <i>CYP2</i>  | <i>TUA5</i> | <i>60S</i>   | <i>G6PD</i>  |             |
| M value           | 0.211        | 0.211        | 0.279        | 0.338        | 0.423        | 0.653       | 0.829        | 1.103        |             |
| PH-roots          | <i>ACT11</i> | <i>UBC4</i>  | <i>ELF1B</i> | <i>Fbox</i>  | <i>CYP2</i>  | <i>60S</i>  | <i>TUA5</i>  | <i>G6PD</i>  |             |
| M value           | 0.279        | 0.279        | 0.347        | 0.416        | 0.637        | 0.710       | 0.817        | 0.908        |             |
| PH Shoots & Roots | <i>UBC4</i>  | <i>CYP2</i>  | <i>TUA5</i>  | <i>ACT11</i> | <i>ELF1B</i> | <i>Fbox</i> | <i>60S</i>   | <i>ELF1A</i> | <i>G6PD</i> |
| M value           | 0.090        | 0.090        | 0.127        | 0.245        | 0.315        | 0.357       | 0.488        | 0.550        | 0.971       |
| ZD32& TL1 & PH    | <i>Fbox</i>  | <i>ELF1B</i> | <i>ACT11</i> | <i>ELF1A</i> | <i>UBC4</i>  | <i>TUA5</i> | <i>CYP2</i>  | <i>G6PD</i>  | <i>60S</i>  |
| M value           | 0.155        | 0.155        | 0.299        | 0.537        | 0.655        | 0.724       | 0.782        | 1.042        | 1.209       |
