# Supplementary material for: Stability evaluation of reference genes for gene expression analysis by RT-qPCR in soybean under different conditions
Source: PLoS One. 2017 Dec 13;12(12):e0189405. doi: 10.1371/journal.pone.0189405 (PMC5728501; doi:10.1371/journal.pone.0189405)
Supplement: S3 Table — (XLS) [file pone.0189405.s003.xls]

## Sheet: Sheet1
Table S3. Raw data of delta CT analysis of the expression stability of the candidate reference genes
	ZD32_SMV			ZD29_SMV			ZD32 vs ZD29_SMV			TL1			TL2			TL1 vs TL2			PH_shoots_N stress			PH_roots_N stress			PH_S vs R_N stress			ZD32 vs TL1 vs PH_all stress
	∆CT	STDEV.P of ∆CT	Ave. of STDEV.P	∆CT	STDEV.P of ∆CT	Ave. of STDEV.P	∆CT	STDEV.P of ∆CT	Ave. of STDEV.P	∆CT	STDEV.P of ∆CT	Ave. of STDEV.P	∆CT	STDEV.P of ∆CT	Ave. of STDEV.P	∆CT	STDEV.P of ∆CT	Ave. of STDEV.P	∆CT	STDEV.P of ∆CT	Ave. of STDEV.P	∆CT	STDEV.P of ∆CT	Ave. of STDEV.P	∆CT	STDEV.P of ∆CT	Ave. of STDEV.P	∆CT	STDEV.P of ∆CT	Ave. of STDEV.P
60S vs Fbox	0.0419153	0.533736		0.0547025	0.872999		0.125513	0.241742		0.792594	0.430066		0.0142645	0.152845		0.281692	0.542702		2.2505	0.758232		3.56012	1.10075		3.34885	1.18499		0.883685	1.24
60S vs ELF1A	3.86743	0.335941		3.49243	0.255652		3.67905	0.61757		3.52164	0.413865		2.81748	0.316444		3.00141	0.839037								5.81624	0.0333086		4.35796	2.12534
60S vs ELF1B	0.357188	0.377866		0.485337	0.128369		0.400019	0.539791		0.460192	0.744678		1.29453	0.385571		1.0066	1.11691		0.224648	1.04256		2.59153	0.848357		1.91206	1.07934		0.420205	1.38681
60S vs Act11	1.62212	0.836879		1.30892	0.36599		1.84651	0.560077		1.58302	0.471039		0.835762	0.345875		1.76162	0.481044		2.97683	1.24948		4.82653	1.09184		3.79097	0.931633		2.60348	1.49536
60S vs TUA5	1.92933	0.2889		1.50943	0.201777					0.851403	0.173002		0.0296789	0.696903					2.93782	1.98056		5.47828	0.459723		4.21869	0.472243		3.1834	2.47362
60S vs UBC4	0.441411	1.60141		0.273431	0.227642		0.393123	1.25775		0.87169	0.334796		0.776831	0.564387		0.663049	0.230081		2.2785	1.07131		2.8283	1.10223		2.4477	0.572628		1.27705	2.33727
60S vs G6PD	0.400877	0.343379		0.678756	0.126305		0.930751	0.791136		1.12282	0.719667		1.61292	0.619886		1.92876	0.689657		0.295193	1.07538		3.29559	1.3681		1.31887	3.05402		0.795995	0.88489
60S vs CYP2	4.02527	0.834604	0.644089	3.89186	0.672504	0.356405	4.04861	0.599508	0.658225	3.79937	0.535565	0.477835	2.95075	0.698891	0.4726	2.79786	1.02552	0.703565	7.1224	1.5137	1.2416	9.20698	0.128421	0.871348	8.36494	0.662771	0.998865	5.5341	2.39369	1.79212
Fbox vs 60S	0.0419153	0.533736		0.0547025	0.872999		0.125513	0.241742		0.792594	0.430066		0.0142645	0.152845		0.281692	0.542702		2.2505	0.758232		3.56012	1.10075		3.34885	1.18499		0.883685	1.24
Fbox vs ELF1A	3.90934	0.231289		3.43773	0.527771		3.80457	0.376642		2.72904	0.129904		2.83175	0.466861		2.71972	0.33231								2.46739	1.2183		3.47427	0.907705
Fbox vs ELF1B	0.315272	0.18358		0.54004	0.410929		0.274506	0.301679		1.25279	0.936448		1.28027	0.350301		1.28829	0.707085		2.02585	0.296869		0.968585	0.418172		1.43679	0.105653		0.46348	0.155174
Fbox vs ACT	1.66404	0.359212		1.25421	0.367217		1.97202	0.355401		0.790429	0.272817		0.850027	0.481125		1.47993	0.308627		0.726325	0.507987		1.26641	0.436734		0.442128	0.253355		1.7198	0.421748
Fbox vs TUA5	1.97124	0.328399		1.45473	0.682757					0.0588098	0.586612		0.0439434	0.712082					0.687324	1.38436		1.91816	1.47022		0.869843	0.712745		2.29972	1.23444
Fbox vs UBC4	0.483326	1.06814		0.328134	0.260799		0.26761	1.06736		0.0790963	0.105219		0.791095	0.609708		0.944741	0.622094		0.0279966	0.383374		0.731815	0.597333		0.901147	0.61236		0.393367	1.16293
Fbox vs G6PD	0.254726	0.254726		0.733459	0.582097		0.805238	0.576325		1.91541	1.0381		1.59866	0.661006		2.21046	0.272769		1.95531	1.57586		0.264524	0.641235		2.02998	1.86903		1.67968	1.36648
Fbox vs CYP2	4.06718	0.302035	0.40764	3.83716	0.414805	0.514922	4.17413	0.375327	0.47064	3.00678	0.739903	0.529883	2.96501	0.786127	0.527507	2.51617	0.533852	0.474206	4.8719	0.775294	0.81171	5.64686	1.0548	0.817034	5.01609	0.522217	0.80983	4.65042	1.34855	0.979626
ELF1A vs 60S	3.86743	0.335941		3.49243	0.255652		3.67905	0.61757		3.52164	0.413865		2.81748	0.316444		3.00141	0.839037								5.81624	0.0333086		4.35796	2.12534
ELF1A vs Fbox	3.90934	0.231289		3.43773	0.527771		3.80457	0.376642		2.72904	0.129904		2.83175	0.466861		2.71972	0.33231								2.46739	1.2183		3.47427	0.907705
ELF1A vs ELF1B	4.22462	0.181362		3.97777	0.172205		4.07907	0.0933676		3.98183	0.818624		4.11202	0.629504		4.00801	0.663334								3.90418	1.11264		3.93775	0.752836
ELF1A vs ACT	2.2453	0.500946		2.18352	0.21854		1.83254	0.292015		1.93862	0.144581		1.98172	0.122656		1.23979	0.588493								2.02526	0.964941		1.75448	0.667422
ELF1A vs TUA5	1.9381	0.0990646		1.98301	0.291414					2.67023	0.5462		2.7878	0.827564											1.59755	0.505551		1.17456	0.414328
ELF1A vs UBC4	3.42602	1.28665		3.76587	0.313824		4.07218	0.81396		2.64995	0.105753		2.04065	0.531504		3.66446	0.85571								3.36854	0.605936		3.08091	0.312909
ELF1A vs G6PD	4.2683	0.0393833		4.17119	0.363538		4.6098	0.364163		4.64445	0.943334		4.43041	0.713221		4.93017	0.444202								4.49737	3.08732		5.15395	2.01888
ELF1A vs CYP2	0.15784	0.527074	0.400214	0.39943	0.530052	0.334125	0.369561	0.191982	0.392814	0.277733	0.628896	0.466395	0.133265	0.675751	0.535438	0.203548	0.382878	0.586566							2.5487	0.69608	1.02801	1.17614	0.693978	0.986675
ELF1B vs 60S	0.357188	0.377866		0.485337	0.128369		0.400019	0.539791		0.460192	0.744678		1.29453	0.385571		1.0066	1.11691		0.224648	1.04256		2.59153	0.848357		1.91206	1.07934		0.420205	1.38681
ELF1B vs Fbox	0.315272	0.18358		3.43773	0.527771		0.274506	0.301679		1.25279	0.936448		1.28027	0.350301		1.28829	0.707085		2.02585	0.296869		0.968585	0.418172		1.43679	0.105653		0.46348	0.155174
ELF1B vs ELF1A	4.22462	0.181362		3.97777	0.172205		4.07907	0.0933676		3.98183	0.818624		4.11202	0.629504		4.00801	0.663334								3.90418	1.11264		3.93775	0.752836
ELF1B vs ACT	1.97931	0.538391		1.79425	0.237682		2.22667	0.303921		2.04321	0.712857		2.13029	0.703048		2.76822	0.950939		2.75218	0.211167		2.235	0.395561		1.87891	0.147703		2.18328	0.319158
ELF1B vs TUA5	2.28652	0.266871		1.99477	0.281966					1.3116	0.641632		1.32421	0.379694					2.71318	1.12888		2.88675	1.25144		2.30663	0.607092		2.7632	1.08708
ELF1B vs UBC4	0.798599	1.2317		0.211906	0.160769		0.0068964	0.888509		1.33188	0.845966		2.07136	0.942357		0.343551	1.20726		2.05385	0.270387		0.23677	0.367416		0.535639	0.506708		0.856847	1.00902
ELF1B vs G6PD	0.0436888	0.220556		0.193419	0.254669		0.530732	0.421269		0.662623	0.316263		0.318391	0.367312		0.922164	0.486897		0.0705454	1.8469		0.704062	1.0058		0.593193	1.97468		1.2162	1.45175
ELF1B vs CYP2	4.38246	0.467358	0.43346	4.3772	0.546156	0.288698	4.38469	0.236367	0.397843	4.25956	0.211601	0.653509	4.24528	0.569589	0.540922	3.80446	0.302948	0.776481	6.89775	0.490852	0.755374	6.61545	0.795976	0.726104	6.45288	0.416564	0.743797	5.1139	1.20939	0.921401
ACT vs 60S	1.62212	0.836879		1.30892	0.36599		1.84651	0.560077		1.58302	0.471039		0.835762	0.345875		1.76162	0.481044		2.97683	1.24948		4.82653	1.09184		3.79097	0.931633		2.60348	1.49536
ACT vs Fbox	1.66404	0.359212		1.25421	0.367217		1.97202	0.355401		0.790429	0.272817		0.850027	0.481125		1.47993	0.308627		0.726325	0.507987		1.26641	0.436734		0.442128	0.253355		1.7198	0.421748
ACT vs ELF1A	2.2453	0.500946		2.18352	0.21854		1.83254	0.292015		1.93862	0.144581		1.98172	0.122656		1.23979	0.588493								2.02526	0.964941		1.75448	0.667422
ACT vs ELF1B	1.97931	0.538391		1.79425	0.237682		2.22667	0.303921		2.04321	0.712857		2.13029	0.703048		2.76822	0.950939		2.75218	0.211167		2.235	0.395561		1.87891	0.147703		2.18328	0.319158
ACT vs TUA5	0.307203	0.564371		0.200514	0.484715					0.731619	0.567215		0.806083	0.934276					0.0390008	0.965645		0.651748	1.41152		0.427715	0.45939		0.579919	1.06674
ACT vs UBC4	1.18071	0.85067		1.58235	0.260024		2.23963	0.916466		0.711333	0.236223		0.0589317	0.41374		2.42467	0.617287		0.698328	0.355339		1.99823	0.279216		1.34328	0.359005		1.32643	0.842776
ACT vs G6PD	2.023	0.496922		1.98767	0.492229		2.77726	0.234039		2.70584	0.876386		2.44869	0.824766		3.69039	0.468006		2.68163	2.04289		1.53094	1.01507		2.47211	2.12238		3.39948	1.36221
ACT vs CYP2	2.40314	0.273809	0.55265	2.58295	0.319891	0.343286	2.2021	0.211011	0.410419	2.21635	0.540517	0.477704	2.11499	0.797855	0.577918	1.03624	0.806151	0.602935	4.14557	0.302883	0.805055	4.38045	1.00515	0.805014	4.57396	0.268862	0.688409	2.93062	0.948463	0.890484
TUA5 vs 60S	1.92933	0.2889		1.50943	0.201777					0.851403	0.173002		0.0296789	0.696903					2.93782	1.98056		5.47828	0.459723		4.21869	0.472243		1.27705	2.33727
TUA5 vs Fbox	1.97124	0.328399		1.45473	0.682757					0.0588098	0.586612		0.0439434	0.712082					0.687324	1.38436		1.91816	1.47022		0.869843	0.712745		0.393367	1.16293
TUA5 vs ELF1A	1.9381	0.0990646		1.98301	0.291414					2.67023	0.5462		2.7878	0.827564											1.59755	0.505551		3.08091	0.312909
TUA5 vs ELF1B	2.28652	0.266871		1.99477	0.281966					1.3116	0.641632		1.32421	0.379694					2.71318	1.12888		2.88675	1.25144		2.30663	0.607092		0.856847	1.00902
TUA5 vs ACT	0.307203	0.564371		0.200514	0.484715					0.731619	0.567215		0.806083	0.934276					0.0390008	0.965645		0.651748	1.41152		0.427715	0.45939		1.32643	0.842776
TUA5 vs UBC4	1.48792	1.37253		1.78286	0.422206					0.0202865	0.484947		0.747152	1.25707					0.659328	1.21691		2.64998	1.45141		1.77099	0.100385		1.90635	0.50197
TUA5 vs G6PD	2.3302	0.0756504		2.18819	0.18477					1.97422	0.564507		1.6426	0.132679					2.64263	2.85757		2.18268	1.65747		2.89982	2.58177		3.9794	2.42663
TUA5 vs CYP2	2.09594	0.619091	0.451859	2.38244	0.804601	0.419276				2.94797	0.446876	0.501374	2.92107	0.365189	0.663182				4.18457	0.868469	1.48606	3.7287	0.464	1.16654	4.14625	0.190528	0.703713	2.3507	0.92883	1.19029
UBC4 vs 60S	0.441411	1.60141		0.273431	0.227642		0.393123	1.25775		0.87169	0.334796		0.776831	0.564387		0.663049	0.230081		2.2785	1.07131		2.8283	1.10223		2.4477	0.572628		1.27705	2.33727
UBC4 vs Fbox	0.483326	1.06814		0.328134	0.260799		0.26761	1.06736		0.0790963	0.105219		0.791095	0.609708		0.944741	0.622094		0.0279966	0.383374		0.731815	0.597333		0.901147	0.61236		0.393367	1.16293
UBC4 vs ELF1A	3.42602	1.28665		3.76587	0.313824		4.07218	0.81396		2.64995	0.105753		2.04065	0.531504		3.66446	0.85571								3.36854	0.605936		3.08091	0.312909
UBC4 vs ELF1B	0.798599	1.2317		0.211906	0.160769		0.0068964	0.888509		1.33188	0.845966		2.07136	0.942357		0.343551	1.20726		2.05385	0.270387		0.23677	0.367416		0.535639	0.506708		0.856847	1.00902
UBC4 vs TUA5	1.48792	1.37253		1.58235	0.260024					0.0202865	0.484947		0.0589317	0.41374		2.42467	0.617287		0.698328	0.355339		1.99823	0.279216		1.34328	0.359005		1.32643	0.842776
UBC4 vs ACT	1.18071	0.85067		1.78286	0.422206		2.23963	0.916466		0.711333	0.236223		0.747152	1.25707					0.659328	1.21691		2.64998	1.45141		1.77099	0.100385		1.90635	0.50197
UBC4 vs G6PD	0.842287	1.29761		0.405325	0.331715		0.537628	0.863314		1.99451	0.935238		2.38975	1.1683		1.26572	0.813233		1.9833	1.74019		0.467291	1.22795		1.12883	2.48139		2.07305	2.1221
UBC4 vs CYP2	3.58386	0.766831	1.18444	4.1653	0.500999	0.309747	4.44174	0.737253	0.934945	2.92768	0.644868	0.461626	2.17392	1.18885	0.83449	3.46091	1.08297	0.775519	4.8439	0.639561	0.81101	6.37868	1.02125	0.863829	5.91724	0.0901435	0.666069	4.25705	0.432109	1.09014
G6PD vs 60S	0.400877	0.343379		0.678756	0.126305		0.930751	0.791136		1.12282	0.719667		1.61292	0.619886		1.92876	0.689657		0.295193	1.07538		3.29559	1.3681		1.31887	3.05402		0.795995	0.88489
G6PD vs Fbox	0.254726	0.254726		0.733459	0.582097		0.805238	0.576325		1.91541	1.0381		1.59866	0.661006		2.21046	0.272769		1.95531	1.57586		0.264524	0.641235		2.02998	1.86903		1.67968	1.36648
G6PD vs ELF1A	4.2683	0.0393833		4.17119	0.363538		4.6098	0.364163		4.64445	0.943334		4.43041	0.713221		4.93017	0.444202								4.49737	3.08732		5.15395	2.01888
G6PD vs ELF1B	0.0436888	0.220556		0.193419	0.254669		0.530732	0.421269		0.662623	0.316263		0.318391	0.367312		0.922164	0.486897		0.0705454	1.8469		0.704062	1.0058		0.593193	1.97468		1.2162	1.45175
G6PD vs ACT	2.023	0.496922		1.98767	0.492229		2.77726	0.234039		2.70584	0.876386		2.44869	0.824766		3.69039	0.468006		2.68163	2.04289		1.53094	1.01507		2.47211	2.12238		3.39948	1.36221
G6PD vs TUA5	2.3302	0.0756504		2.18819	0.18477					1.97422	0.564507		1.6426	0.132679					2.64263	2.85757		2.18268	1.65747		2.89982	2.58177		3.9794	2.42663
G6PD vs UBC4	0.842287	1.29761		0.405325	0.331715		0.537628	0.863314		1.99451	0.935238		2.38975	1.1683		1.26572	0.813233		1.9833	1.74019		0.467291	1.22795		1.12883	2.48139		2.07305	2.1221
G6PD vs CYP2	4.42615	0.543457	0.408961	4.57062	0.797654	0.391622	4.97937	0.317604	0.509693	4.92219	0.350567	0.718007	4.56367	0.251554	0.592341	4.72663	0.413924	0.51267	6.8272	2.32309	1.92313	5.91138	1.35231	1.18113	19.1244	2.39125	2.44523	6.3301	2.01603	1.70612
CYP2 vs 60S	4.02527	0.834604		3.89186	0.672504		4.04861	0.599508		3.79937	0.535565		2.95075	0.698891		2.79786	1.02552		7.1224	1.5137		9.20698	0.128421		8.36494	0.662771		5.5341	2.39369
CYP2 vs Fbox	4.06718	0.302035		3.83716	0.414805		4.17413	0.375327		3.00678	0.739903		2.96501	0.786127		2.51617	0.533852		4.8719	0.775294		5.64686	1.0548		5.01609	0.522217		4.65042	1.34855
CYP2 vs ELF1A	0.15784	0.527074		0.39943	0.530052		0.369561	0.191982		0.277733	0.628896		0.133265	0.675751		0.203548	0.382878								2.5487	0.69608		1.17614	0.693978
CYP2 vs ELF1B	4.38246	0.467358		4.3772	0.546156		4.38469	0.236367		4.25956	0.211601		4.24528	0.569589		3.80446	0.302948		6.89775	0.490852		6.61545	0.795976		6.45288	0.416564		5.1139	1.20939
CYP2 vs ACT	2.40314	0.273809		2.58295	0.319891		2.2021	0.211011		2.21635	0.540517		2.11499	0.797855		1.03624	0.806151		4.14557	0.302883		4.38045	1.00515		4.57396	0.268862		2.93062	0.948463
CYP2 vs TUA5	2.09594	0.619091		2.38244	0.804601					2.94797	0.446876		2.92107	0.365189					4.18457	0.868469		3.7287	0.464		4.14625	0.190528		2.3507	0.92883
CYP2 vs UBC4	3.58386	0.766831		4.1653	0.500999		4.44174	0.737253		2.92768	0.644868		2.17392	1.18885		3.46091	1.08297		4.8439	0.639561		6.37868	1.02125		5.91724	0.0901435		4.25705	0.432109
CYP2 vs G6PD	4.42615	0.543457	0.541783	4.57062	0.797654	0.573333	4.97937	0.317604	0.381293	4.92219	0.350567	0.512349	4.56367	0.251554	0.666726	4.72663	0.413924	0.649749	6.8272	2.32309	0.987694	5.91138	1.35231	0.831701	19.1244	2.39125	0.654801	6.3301	2.01603	1.24638
